# Supplementary material for: Chiral gold nanoparticle-based electrochemical sensor for enantioselective recognition of 3,4-dihydroxyphenylalanine
Source: Royal Society of Chemistry journal article supplement (doi:10.1039/c0cc01071e), 2010-01-01
Supplement: c0cc01071e.pdf [file c0cc01071e.pdf]

## Chiral gold nanoparticle-based electrochemical sensor for enantioselective recognition of 3,4-dihydroxyphenylalanine

Yeon-Joo Kang,<sup>a</sup> Jeong-Wook Oh,<sup>a</sup> Yang-Rae Kim,<sup>a</sup> Jong Seung Kim<sup>\*b</sup> and Hasuck Kim<sup>\*a</sup>

<sup>a</sup> Department of Chemistry, Seoul National University, Seoul 151-747, Korea.

E-mail: [hasuckkim@snu.ac.kr](mailto:hasuckkim@snu.ac.kr); Fax: +82-2-880-1568; Tel: +82-2-880-6666

<sup>b</sup> Department of Chemistry, Korea University, Seoul 136-701, Korea.

E-mail: [jongskim@korea.ac.kr](mailto:jongskim@korea.ac.kr); Fax: +82-2-3290-3121; Tel: +82-2-3290-3143

### Experimental procedures

#### Chemicals

Enantiopure D-penicillamine (D-Pen, > 99 %), L-penicillamine (L-Pen, > 99 %), sodium borohydride (NaBH<sub>4</sub>), 3,4-dihydroxyphenylalanine (DOPA) enantiomers (D- and L-form), and 1,4-butanedithiol (BDT) were obtained from Sigma-Aldrich and were used as received. Hydrogen tetrachloroaurate tetrahydrate (HAuCl<sub>4</sub>•4H<sub>2</sub>O, 99 %) was purchased from Acros Organics. All other chemicals were of analytical grade and used without further purification. All aqueous solutions were prepared using deionized water (> 18 MΩ cm resistivity) purified in a Milli-Q system. Fresh DOPA solutions containing 0.25 M H<sub>2</sub>SO<sub>4</sub> (pH 0.6) were prepared and thoroughly deaerated with highly pure nitrogen before electrochemical experiments.

## Instrumentation

Electrochemical experiments were performed using a two-compartment three-electrode cell with a gold working electrode, a platinum wire auxiliary electrode, and a saturated Ag/AgCl reference electrode. A CHI660A electrochemical workstation (CH Instruments Co., USA) was used for electrochemical experiments. The size and morphology of synthesized Pen-AuNPs were investigated using a JEOL JEM-3010 transmission electron microscope (TEM) operated at an acceleration voltage of 100 kV. The mean diameters of Pen-AuNPs were estimated by measuring the diameters of 100 individual nanoparticles. The absorption spectra of Pen-AuNPs were obtained with a UV-vis absorption spectrometer (Scinco S-3100, Korea). Circular dichroism (CD) spectra were recorded with a JASCO J-715 spectropolarimeter using a bandwidth of 2 nm. The resolution for ellipticity was 0.01 mdeg. The CD spectra were obtained by averaging four scans.

## Preparation of Pen-AuNPs

Pen-AuNPs were synthesized by a procedure reported previously.<sup>1</sup> Each of two kinds of penicillamine enantiomers (D- or L-form) was used as a capping ligand of AuNPs. Briefly, 0.5 mmol of HAuCl<sub>4</sub> dissolved in water (0.121 M) and 1.0 mmol of penicillamine were first mixed in methanol (100 mL). A freshly prepared 0.2 M aqueous NaBH<sub>4</sub> solution was rapidly added under vigorous stirring. After stirring for 2 h, the solution was stored overnight. Adding ethanol (300 mL) to the solution gave a dark-brown precipitate. The precipitate was thoroughly washed with water/ethanol (1:9) and ethanol, after which the precipitate was re-dissolved in ethanol. After centrifugation for 1 h, the precipitate was filtered using a 0.2  $\mu$ m PTFE membrane and successively washed with water/ethanol (1:9, 1:1, 1:3, 1:4, and 1:9). Finally, a powder of Pen-AuNPs was obtained by a freeze-drying procedure. The powder was redispersed in distilled water prior to electrochemical experiments. The Pen-AuNP solutions were stored at 4 °C and were stable for a month without aggregation.

### Preparation of Pen-AuNP-immobilized gold electrode

Gold electrodes 1.6 mm in diameter were polished using 0.3  $\mu\text{m}$  alumina powder (Buehler, Lake Bluff, MN) and rinsed with deionized water. Residual alumina particles were thoroughly removed by sonicating the electrodes in ethanol and deionized water for 5 min, respectively. The electrodes were immersed in 0.5 M  $\text{H}_2\text{SO}_4$ , and subsequently, applied potential differences of +2.0 V for 5 s and -0.35 V for 10 s. They were electrochemically cleaned in 0.5 M  $\text{H}_2\text{SO}_4$  by cycling the electrode potential between -0.3 and +1.55 V with a scan rate of 4 V/s until a reproducible cyclic voltammogram was obtained. Finally, they were checked by performing cyclic voltammetry in a fresh 0.5 M  $\text{H}_2\text{SO}_4$  solution with a scan rate of 0.1 V/s between -0.3 and +1.55 V. The electrochemically cleaned gold electrodes were immersed in an ethanol solution containing 2 mM of BDT for 2 h. They were thoroughly rinsed with ethanol to remove the physically adsorbed BDT. The BDT-modified electrodes were subsequently soaked in the Pen-AuNP solution for 30 min. We found that 30 min was the optimal condition since differences in the anodic peak potentials between D- and L-DOPA ( $\Delta E$ ) on Pen-AuNP-immobilized gold electrodes was maximized at 30 min. The Pen-AuNP-immobilized electrodes were washed with copious amount of water and used for electrochemical experiments.

### Reference

- 1 a) H. Yao, K. Miki, N. Nishida, A. Sasaki and K. Kimura, *J. Am. Chem. Soc.* 2005, **127**, 15536; b) H. Yao, T. Fukui and K. Kimura, *J. Phys. Chem. C* 2007, **111**, 14968.

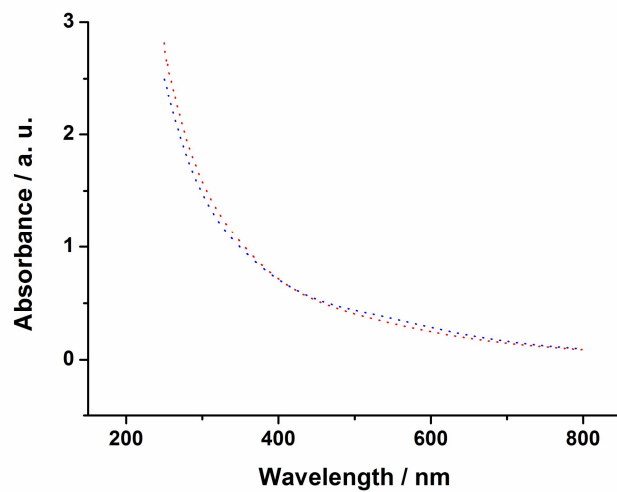

**Fig. S1** The UV-vis spectra of 1.9 nm-diameter Pen-AuNPs. The red and blue dotted curves indicate the spectra of D- and L-Pen-AuNPs, respectively.

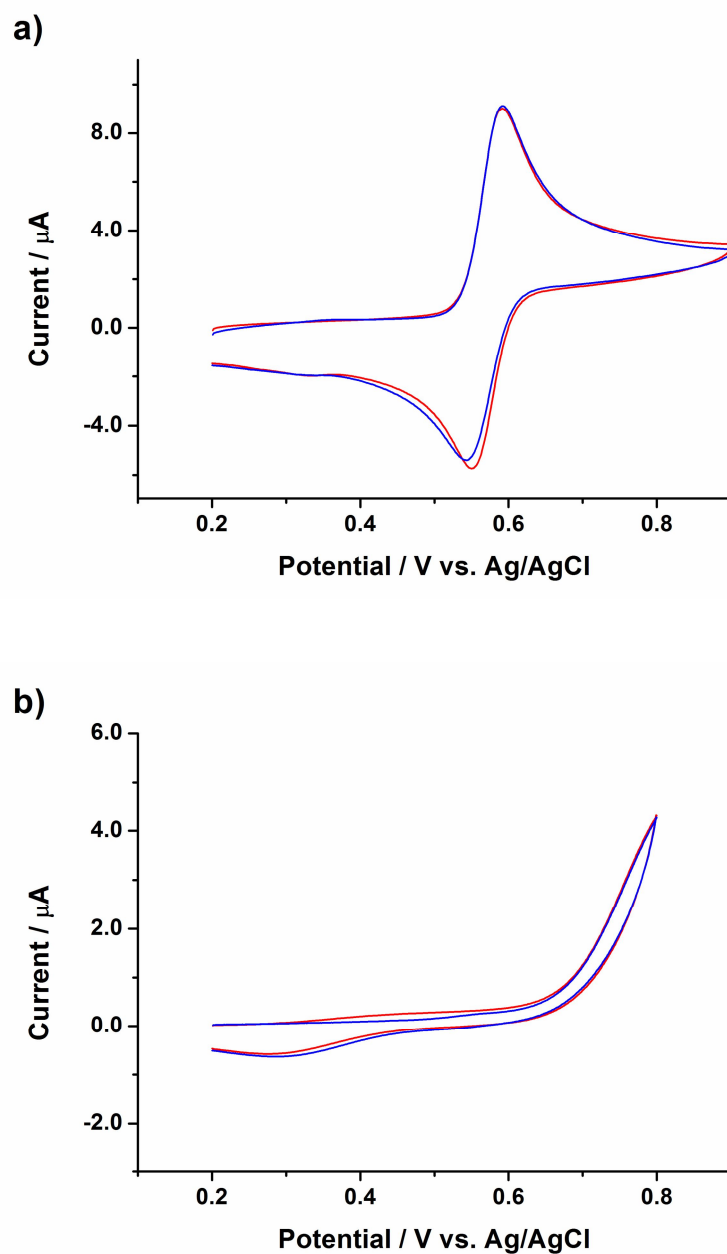

**Fig. S2** Cyclic voltammograms for DOPA on a) bare gold and b) BDT-modified gold electrodes in 0.25 M  $\text{H}_2\text{SO}_4$  (pH 0.6). The scan rate was 50 mV/s. The electrode area was  $2.01 \text{ mm}^2$ . The red and blue curves indicate the voltammograms for D- and L-DOPA, respectively.

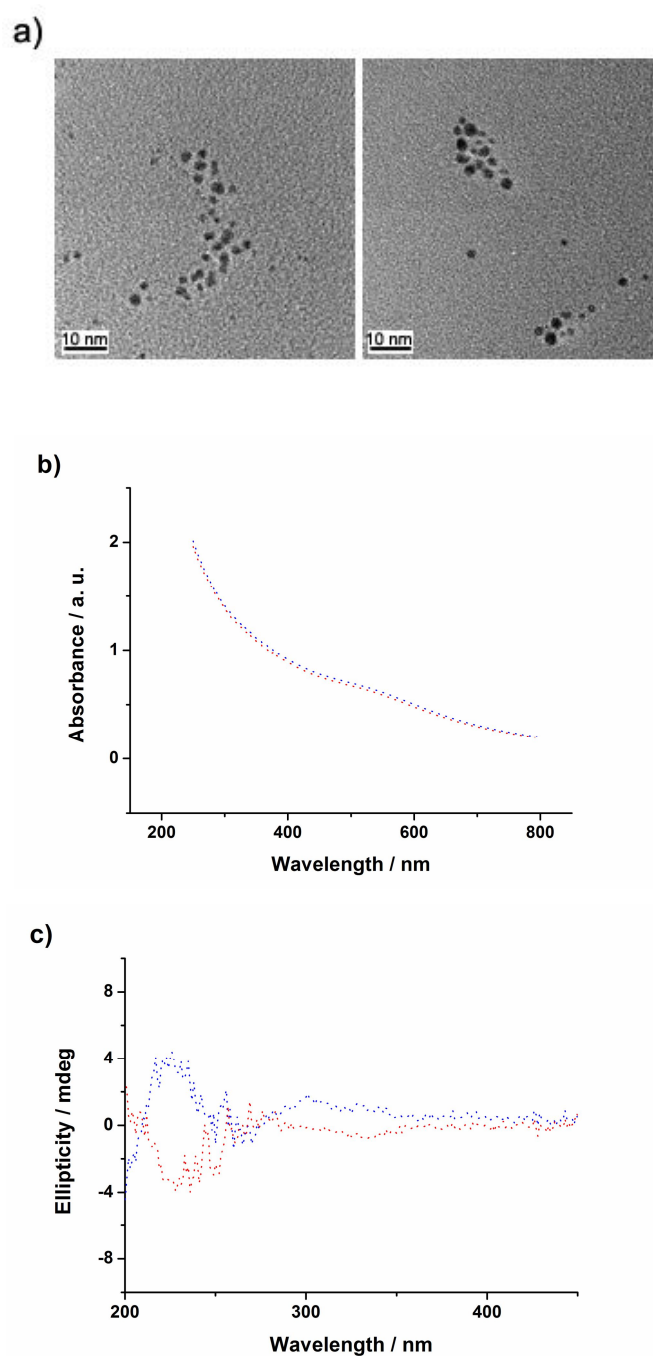

**Fig. S3** Characterization of 3.1-nm-diameter Pen-AuNPs. a) TEM images of D-Pen AuNPs (left) and L-Pen AuNPs (right). b) UV-vis and c) CD spectra of D-Pen AuNPs (red dotted line) and L-Pen AuNPs (blue dotted line).

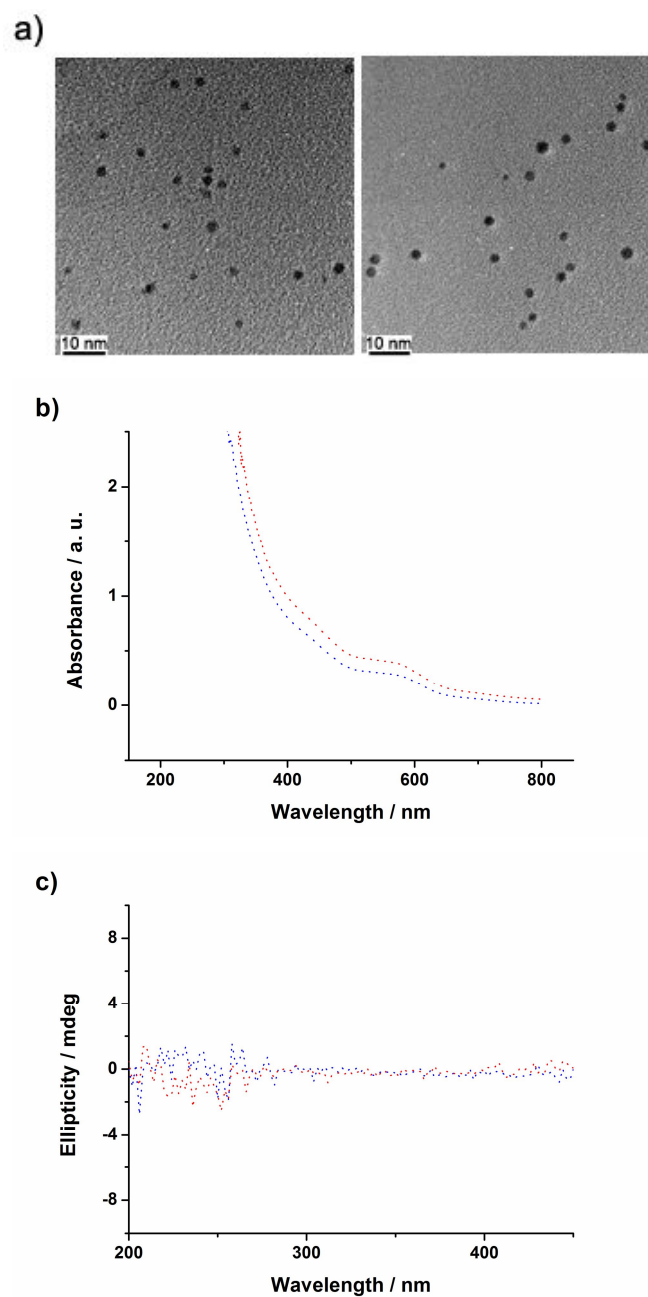

**Fig. S4** Characterization of 4.0-nm-diameter Pen-AuNPs. a) TEM images of D-Pen AuNPs (left) and L-Pen AuNPs (right). b) UV-vis and c) CD spectra of D-Pen AuNPs (red dotted line) and L-Pen AuNPs (blue dotted line).

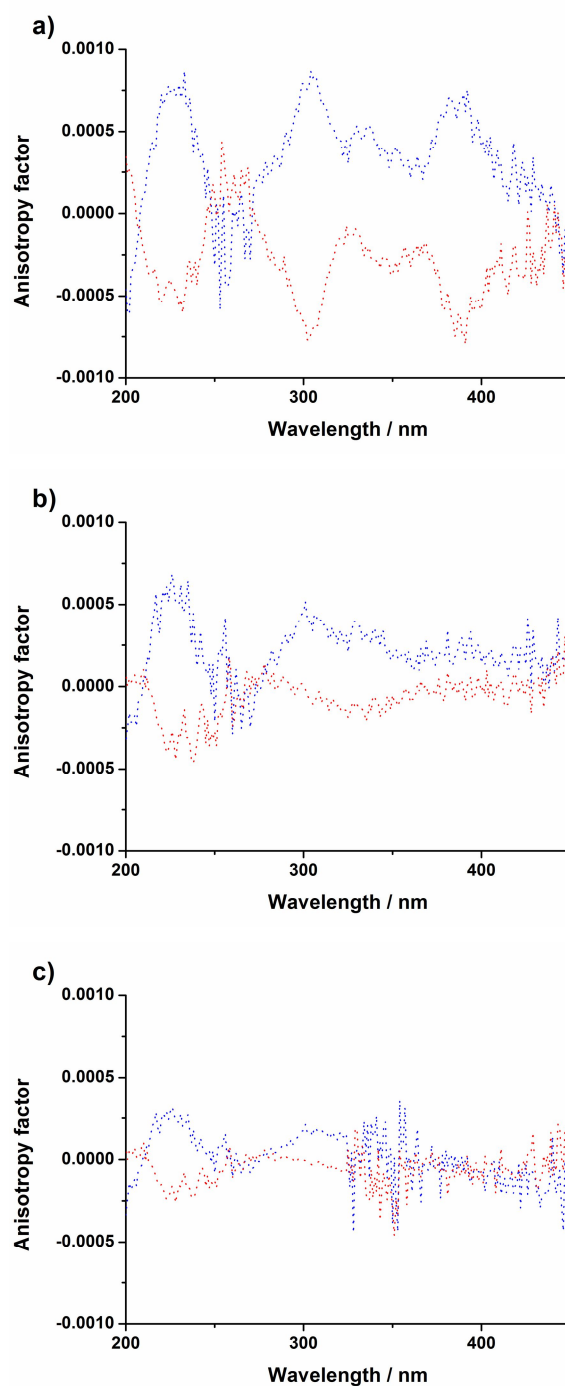

**Fig. S5** Anisotropy factors (g-factors) for (a) 1.9-, (b) 3.1-, and (c) 4.0-nm-diameter Pen-AuNPs.  $g = \Delta\epsilon/\epsilon \approx \theta/(33 \cdot A)$ , where  $\epsilon$  is the extinction coefficient,  $A$  is the absorbance, and  $\theta$  is the ellipticity.

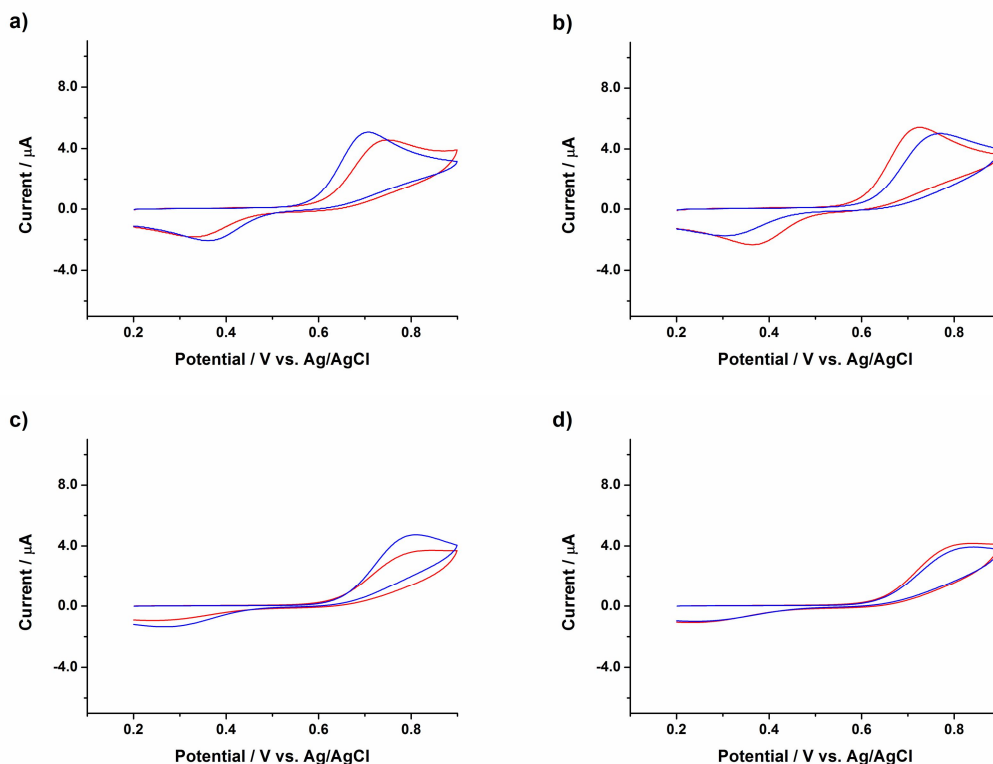

**Fig. S6** Cyclic voltammograms for enantioselective recognition of DOPA using Pen-AuNPs of various sizes in 0.25 M  $\text{H}_2\text{SO}_4$  (pH 0.6). The scan rate was 50 mV/s. The electrode area was  $2.01 \text{ mm}^2$ . a) 3.1-nm-diameter D-Pen AuNPs, b) 3.1-nm-diameter L-Pen-AuNPs, c) 4.0-nm-diameter D-Pen AuNPs, and d) 4.0-nm-diameter L-Pen-AuNP-immobilized gold electrodes. The red and blue curves indicate the voltammograms for D- and L-DOPA, respectively.
